# Supplementary material for: Nxf1 Natural Variant E610G Is a Semi-dominant Suppressor of IAP-Induced RNA Processing Defects
Source: PubMed Central journal article supplement (PMC4383553; doi:10.1371/journal.pgen.1005123), 2015-04-02

### A: Full length IAPs

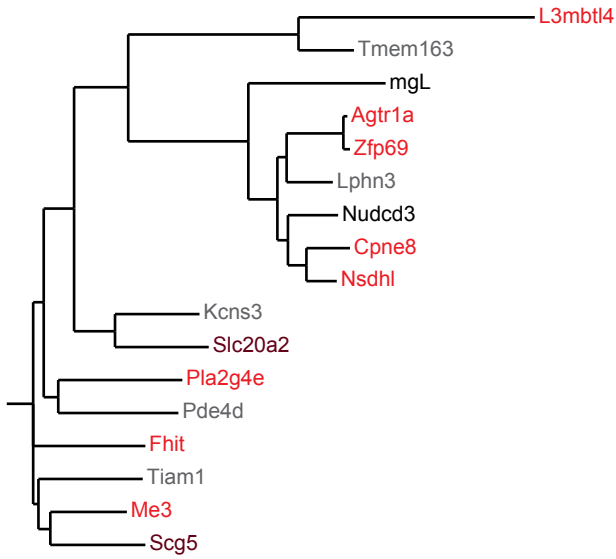

Alignment length: 7521  
 Input median: 7119  
 Input range: 7065-7268

### B: Δ1 IAPs

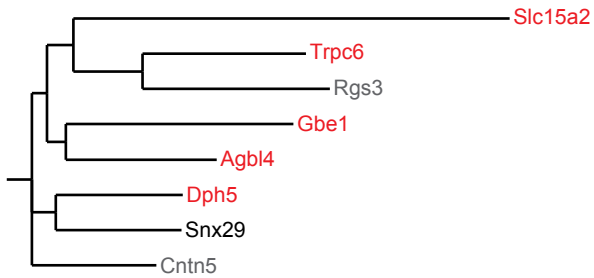

Alignment length: 5604  
 Input median: 5343  
 Input range: 5295-5471

### C: LTRs

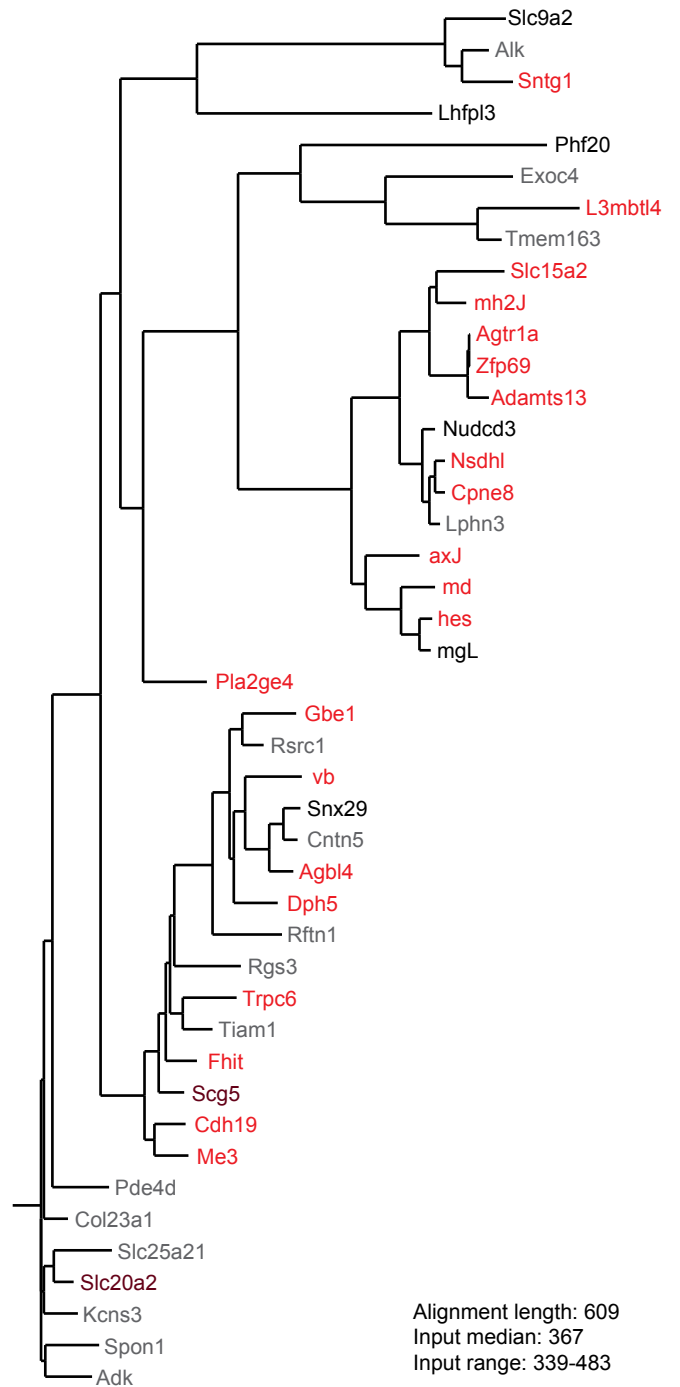

Alignment length: 609  
 Input median: 367  
 Input range: 339-483

Figure S6 – p. 2

D: LTR-gag interval

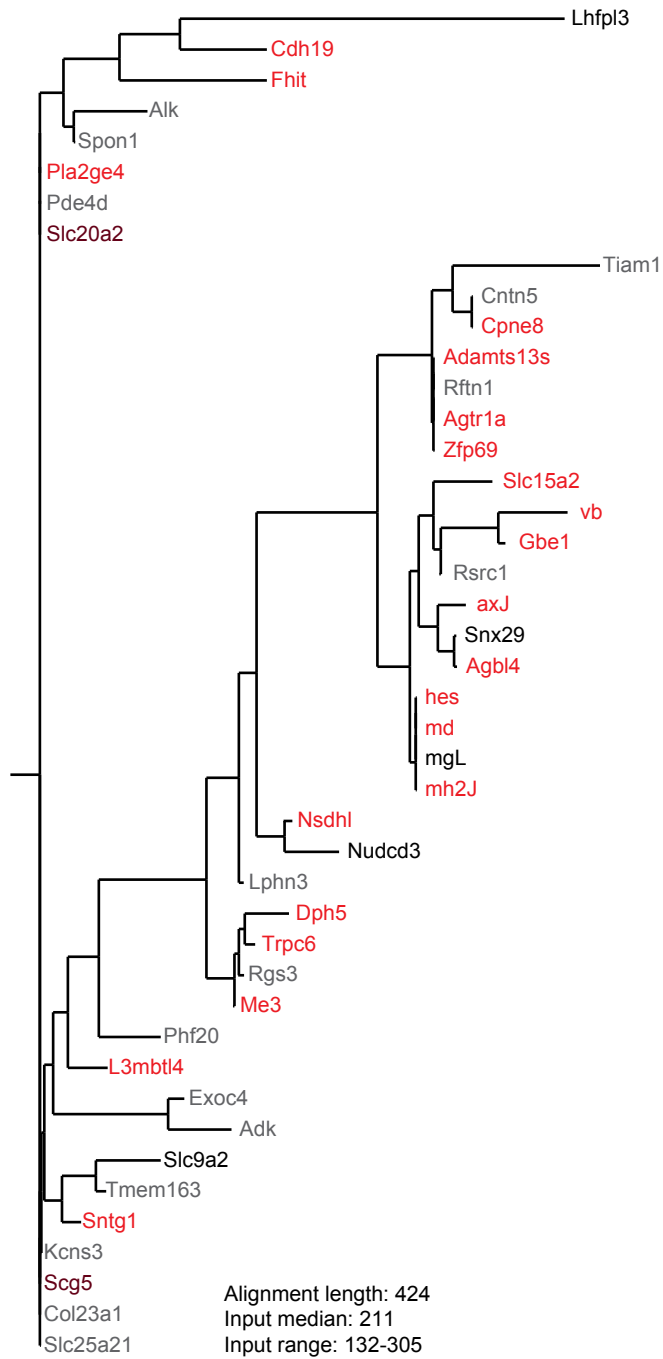

E: gag

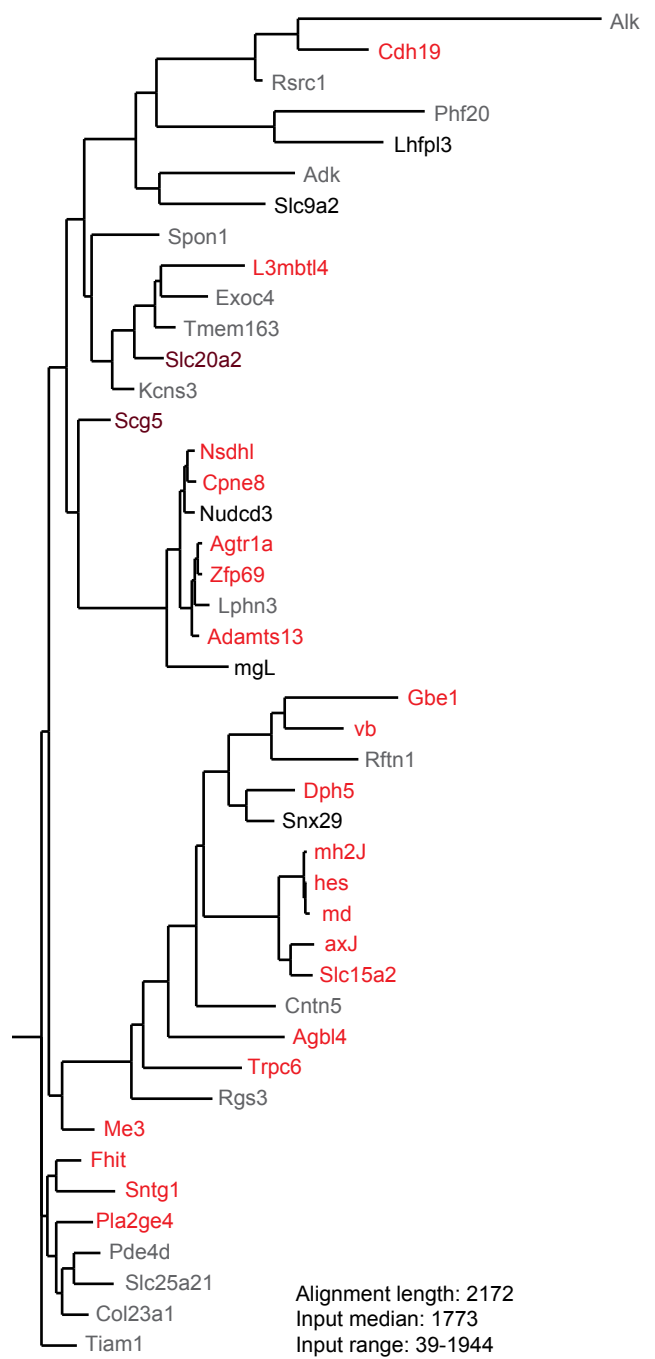

Figure S6 – p. 3

F: prt

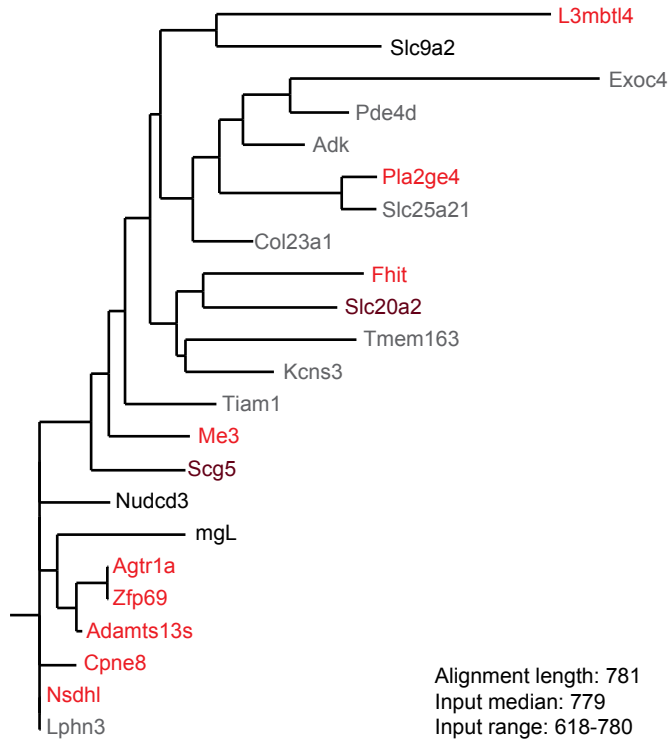

G: prt to pol

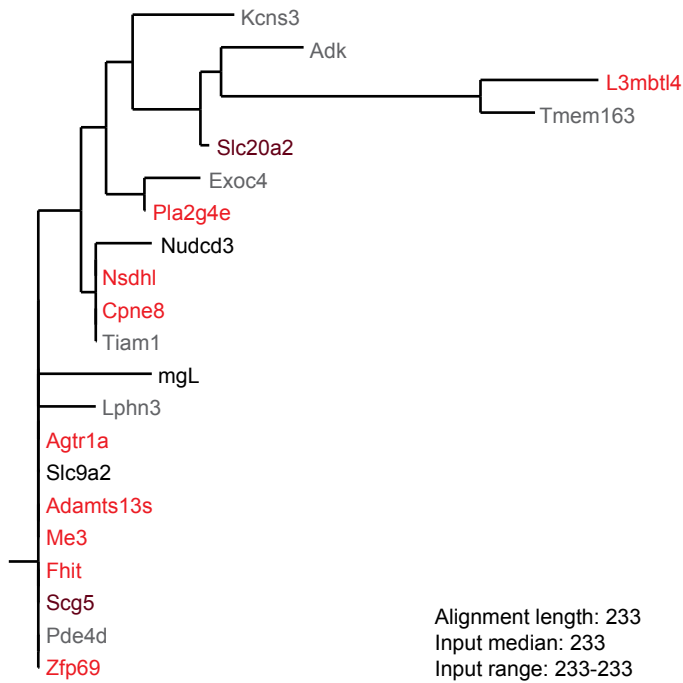

Figure S6 - p.4

H: pol

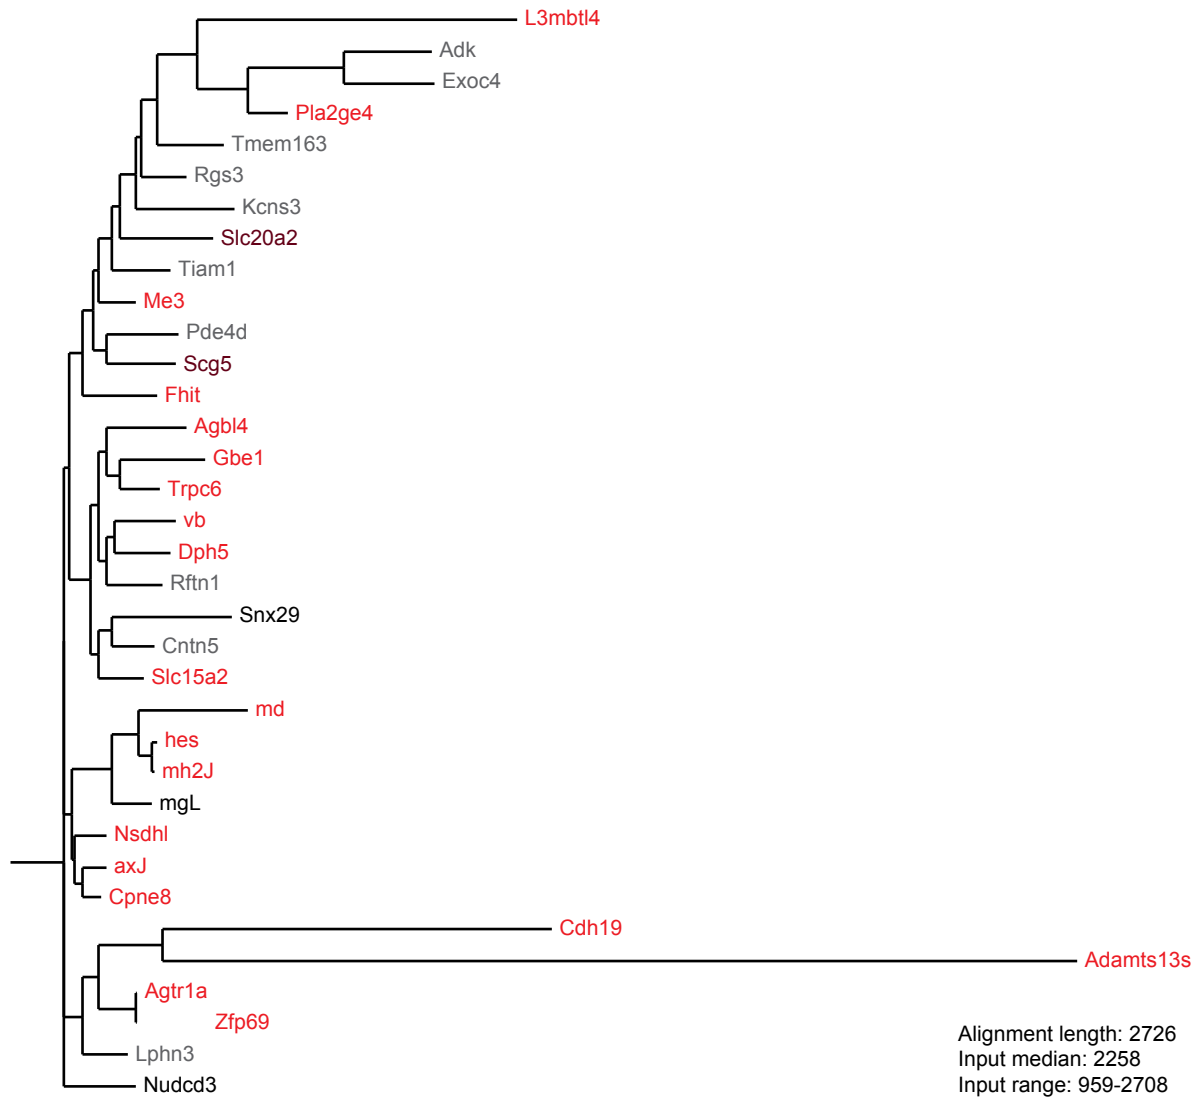

Figure S6 - p.5

I: pol to RTE

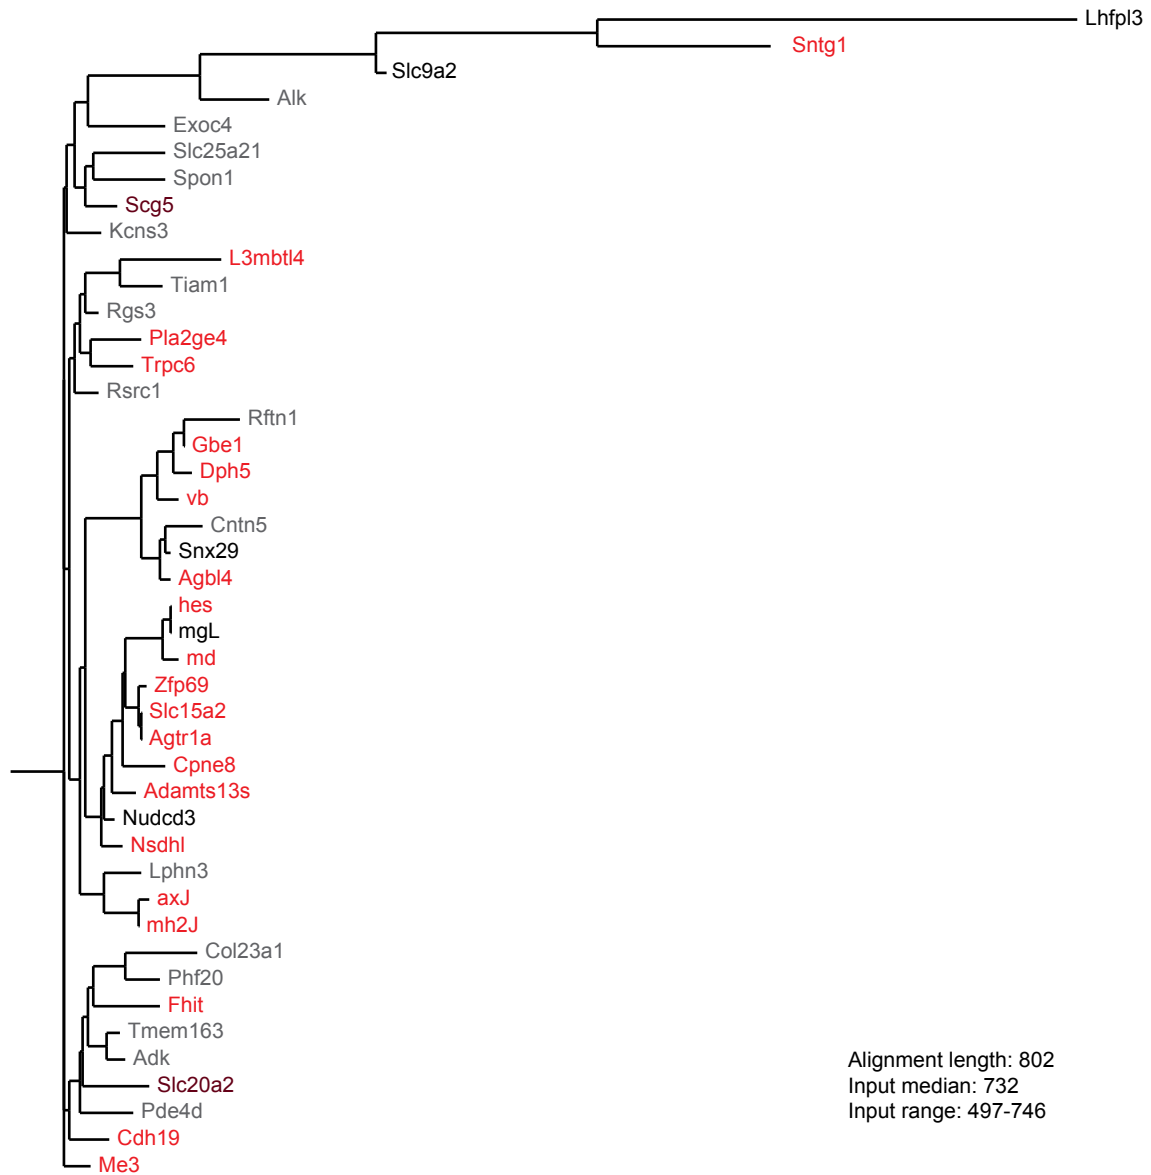

Figure S6 - p.6  
J: RTE

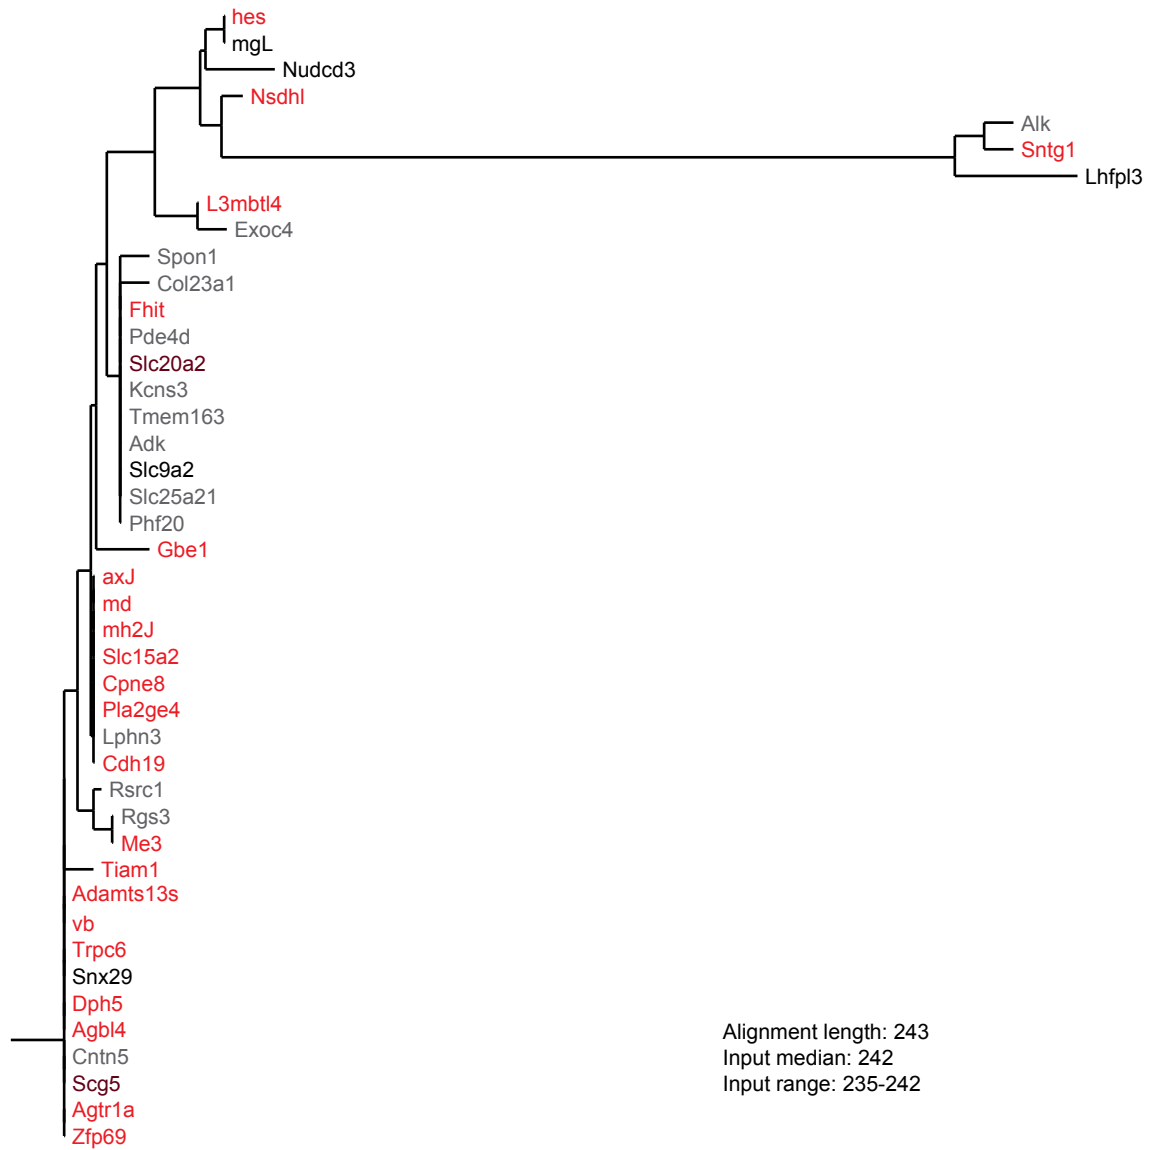

Figure S6 - p. 7

K: ppt

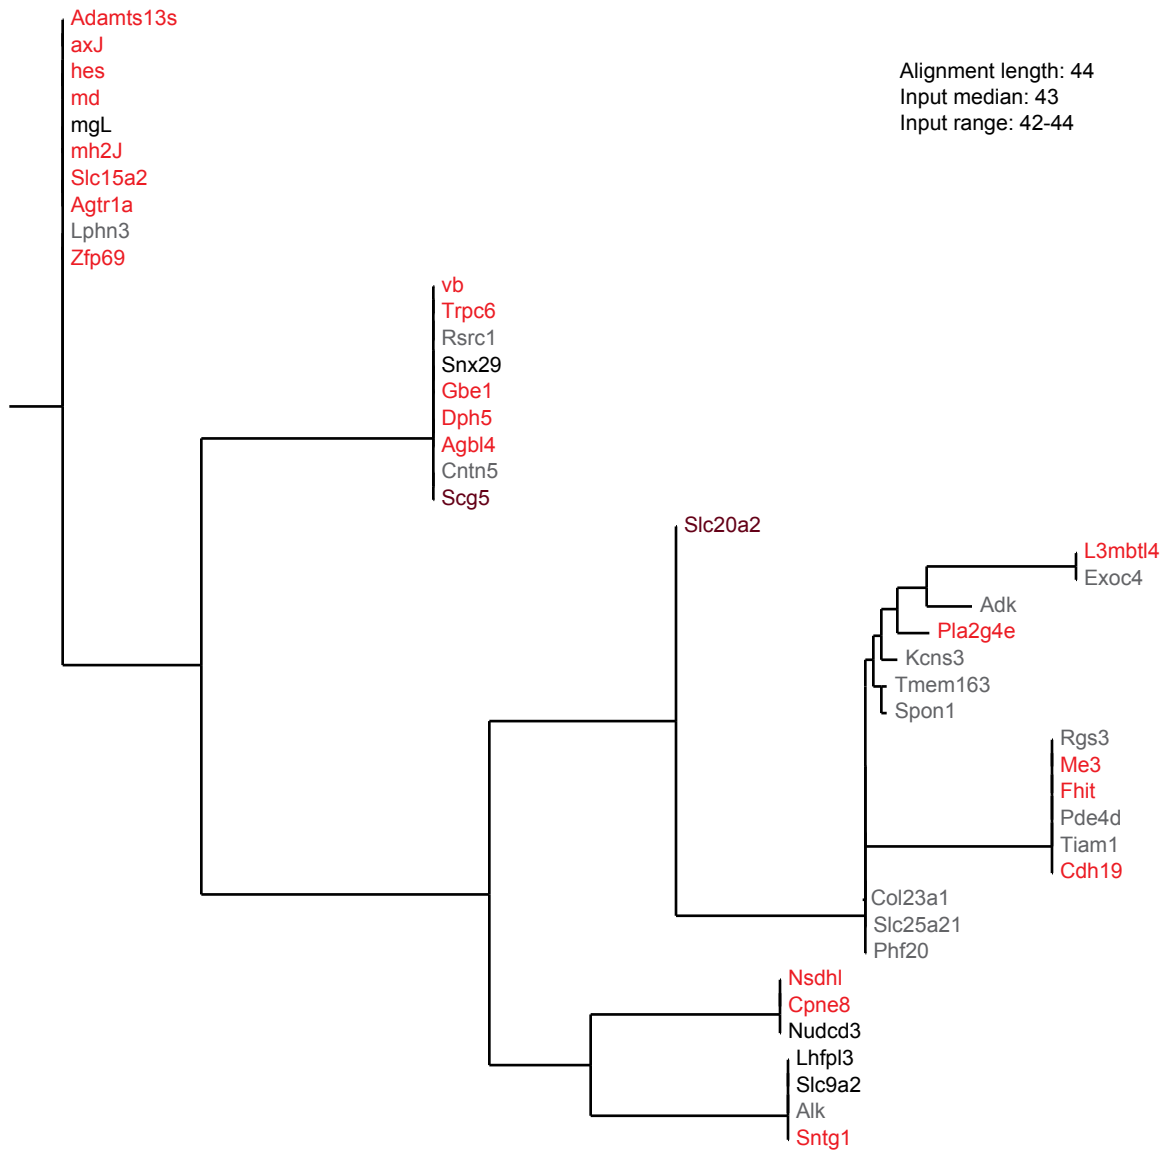

Supplement: pgen.1005123.s011.pdf [file pgen.1005123.s011.pdf]
