# Supplementary material for: Nxf1 Natural Variant E610G Is a Semi-dominant Suppressor of IAP-Induced RNA Processing Defects
Source: PLoS Genet. 2015 Apr 2;11(4):e1005123. doi: 10.1371/journal.pgen.1005123 (PMC4383553; doi:10.1371/journal.pgen.1005123)
Supplement: S3 Table — Sequences used in genome searches for IAP sequences in introns. (XLSX) [file pgen.1005123.s003.xlsx]

## Sheet: S3-IAPseeds
IAP_Conserved_Queries
Name	Sequence
>IAP.1	GACGAGAAAAAACTCCGGACTGGCGCAGGAGGGAT
>IAP.2	CCGTAACACAGACTGTTGAGAAGGATTCAACTGCC
>IAP.3	CAGAACTCATCAGCTGGGGAACGACGGTGATAAAG
>IAP.4	CTTTCCAAGGGTCTTGAACCCGAGGAAAAGTTAAG
>IAP.5	GGCAGTGCGCAGACTCATTCATTCCCCGAGAGGAA
>IAP.6	GGAGCCGAGGGTGGGCGTGTCCACGCTCCGGTAGA
>IAP.7	AGAGAGATTGGACTTTTGACTTGTTAACGGGTCAG
>I∆1.1	TCTCTCGAGCAGGTGAAACCACTGGTCAGTTAACA
>I∆1.2	GATTTTGTGGCCAGAATGACAGAGGCAGCAGAGCG
>I∆1.3	CGAGCAAGCCACAAAGGAGTGCCGAGCGGCCATAG
>I∆1.4	CCTCTCAGCAATGCAGGTTTAGCGGCTGCCATCCT
>I∆1.5	AGAGCTCCAGATAAACAGGGAGGGACTCTCACTCT
>I∆1.6	AAAACGGGTCACCGGGCCCTCGGTCCCAGGGCCCT
>I∆1.7	CAGGACCCAGGAAGCAGTCAGAGAGACGACCCAGG
>I∆1.8	TTCAGCCGGTGCCGGTGGAGCCTATACCATCCTTG
>I∆1.9	AACATTCCCCTGAAATACAGGTCCTGTGCTCAAGC
>I∆1.10	GACCTGAGATAAAGAAAATGGGCTCCACAGGAAAT
>I∆1.11	CAGAGTCATCTCATTCATTACAGGGCCTAGGATAT
>I∆1.12	ATGAAAACGCCCCATCAGGAGGGTATTCAGCTAAA
>I∆1.13	ACCCATACCATGGAAAACAGGGGACCCAGTGTGGG
>I∆1.14	CTCTACCTCACCCTGGAATACTCCAATTTTTGTAA
>I∆1.15	GGGTCTCCCTGTACTTTCCGCCTTACCACGTGGCT
>IAP.8	GGAACAATTCCCCTCTTTAATTTTGCTCCTTTACA
>IAP.9	CCATAAAGACCTTACCATGCTACAAAAGGCATATC
>IAP.10	CAAATTTCTGATACAGGACAATTCTTGGGCTCTGT
>IAP.11	CTTAAATGATTTTCAAAAGCTGTTGGGAGATATTA
>IAP.12	CCCTAGGACTCTTACTCTAGCTGCTAACCAGGCCT
>IAP.13	GAATGCACAATTACAACGTATTGAGGATTCGCAGC
>IAP.14	CGTATCCCCAGCTAAAATAATAGATTGGTATCCTG
>IAP.15	TACCGCTGCACAGGTTCAAACCTTGGCAGCCGCAT
>IAP.16	AAATCAATCTGTTGTGTTTCCACAAATAACAGTAA
>IAP.17	TAGGTGCCTATGTGGCTAATGGTAAAGTGGTATCC
>IAP.18	ATCTTTTAGAAGTGGCTGGAGTGATTAAGCCTTCC
>IAP.19	GAGCCCATTCAGGCCTACCTGGCCCCATGGCTCTG
>IAP.20	CTAAAGTGGTGGCTGCTGCCCTATCATCCCCGGTA
>IAP.21	GTGACATTGTTACTCAATGTCAAAGCTGCTGTGAG
>IAP.22	CCTTTGGAAAACTTCAATATCTCCATGTGTCCATT
>IAP.23	GTGCTTGGGGGAAACCCAGACTCCTTAAGACTGAT
>IAP.24	CTCAAGGACAGGGTATTGTTGAGCGTGCGCATCGC
>IAP.25	CGTCATTGTTCAGAGCCAGATAGGCCCAATGAGAT
>IAP.26	AATAAATGGTATGGCCCGGATCCTATCTTGATAAG
>IAP.27	TGACCAAGGGAATACTAATGTCCCTCGTCTTGGTG
>IAP.28	TGCTCAAGTATTCTCCTGCTTTTTTACCACTAACT
>IAP.29	AACAGGCCTCAGCTAATGTCAAGATACAGAGAGGT
>IAP.30	ACTCAGCAGGGATGTGAACAAAAGTTTCCGGGATT
>IAP.31	ATTTGTCAAAAAGTCTTTTTCAGTATATGTTACAG
>IAP.32	ACCCAATTGGATCTCCTCAGCATTTTCTTTCTTTA
>IAP.33	TATTGCCCAGGCGCTTGCAGGACTAGAACATGGAG
>IAP.34	CTTCAGCAGCCCGAGAGAGTTGCAAGGCTAAGCAC
>IAP.35	TAGTTCCCTTCCCCCAGGCAAAACGACACGGGAGC
>IAP.36	CCTCTATCTCCACTCTCATTAATATGGGTGGCCTA
